# Supplementary material
Source: publisher figshare collection journal article supplement (https://plos.figshare.com/ndownloader/files/39649939)
Supplement: Supplementary file [file 39649939]

## PSEUDOTIME ANALYSIS

We applied a cross-sectional data of breast cancer patients with 143 epithelial specimens and 157 mesenchymal specimens out of a total of 1215 TCGA-BRCA samples [1], and used the pseudotime analysis to transform static dataset into a time series dataset. Specifically, the temporal progression inference was performed to quantitatively order samples based on the whole RNA-binding protein expression profile with epithelial specimens and mesenchymal specimens labeled by 1 and 2, respectively. The algorithm for pseudotime analysis [2] is described as follows:

- 1) Stage-weighted and locally scaled Gaussian kernel:

$$S(x, y) = \exp(-\gamma \|T_x - T_y\|^2), \quad (1)$$

where the parameter

$$\gamma = \frac{\omega_{xy}}{\varepsilon_x^2 + \varepsilon_y^2},$$

$\omega_{xy}$  is a weight coefficient given by EM transition process, which is defined in this study as  $\omega_{xy} = 1 + |G_x - G_y|$ , with the grades  $G_x$  and  $G_y$  representing EM transition process information of two specimens  $x$  and  $y$ , respectively. If a specimen  $x$  belongs to epithelial specimens, then  $G_x = 1$ ; If a specimen  $x$  belongs to mesenchymal specimen, then  $G_x = 2$ . Moreover, the parameter  $\varepsilon_x$  is adaptive for each specimen  $x$  and is set as the specimen's distance to  $\kappa$ -th nearest neighbor. More specifically, we calculate the Euclidean distance between the RNA-binding protein profile of specimen  $x$  and the RNA-binding protein profile of the other sample. For specimen  $x$ , we can get a total of 300 Euclidean distances, sort these Euclidean distances, and assign the third-smallest Euclidean distance value (here let  $\kappa = 3$ ) to  $\varepsilon_x$ . For example, consider the following dataset,

| Specimen        | RBP1 | RBP2 | RBP3 |
|-----------------|------|------|------|
| TCGA-BH-A0C7-01 | 11.7 | 8.9  | 9.6  |
| TCGA-A8-A06N-01 | 12.3 | 9.0  | 9.7  |
| TCGA-D8-A1XV-01 | 11.9 | 8.6  | 9.3  |
| TCGA-E9-A1N3-01 | 11.9 | 8.7  | 9.1  |

For the specimen TCGA-BH-A0C7-01, the Euclidean distances are shown as below

| Euclidean distance | TCGA-BH-A0C7-01 |
|--------------------|-----------------|
| TCGA-BH-A0C7-01    | 0               |
| TCGA-A8-A06N-01    | 0.6164          |
| TCGA-D8-A1XV-01    | 0.4690          |
| TCGA-E9-A1N3-01    | 0.5745          |

If  $\kappa = 3$ , then specimen TCGA-BH-A0C7-01's distance to 3-th nearest neighbor is 0.5745.

$T_x$  and  $T_y$  are vectors used to represent the RNA-binding protein expression profiles of the respective specimens  $x$  and  $y$ ,  $\|T_x - T_y\|$  is the  $L^2$  norm of  $T_x - T_y$ .

2) Normalization of  $S$ :

$$H_{xy} = \frac{S(x, y)}{D(x)D(y)}, \quad (2)$$

where  $D(x) = \sum_{y \in \Omega} S(x, y)$  and  $\Omega$  is the set of all specimens.

3) Then a transition probability matrix  $P = (P_{xy})$  is defined, where

$$P_{xy} = E(x)^{-\frac{1}{2}} H_{xy} E(y)^{-\frac{1}{2}}, \quad (3)$$

and  $E(x) = \sum_{y \in \Omega} H_{xy}$  is the row normalization of  $H$ .

4) The accumulated transition probability:

$$Q = [I - (P - \psi_0 \psi_0^T)]^\dagger - I, \quad (4)$$

where  $\psi_0$  is the first eigenvector of  $P$  (corresponding to eigenvalue 1) and  $(I - (P - \psi_0 \psi_0^T))^\dagger$  is the generalized inverse (or Moore-Penrose inverse) of  $I - (P - \psi_0 \psi_0^T)$ .

5) A pseudotime distance between two specimens is defined as follows:

$$PD(x, y) = \|Q(x, \cdot) - Q(y, \cdot)\|, \quad (5)$$

where  $\|\cdot\|$  is the  $L^2$  norm.

6) The root sample  $x_0$  can be identified according to the following formula:

$$x_0 = \arg \max_{x \in \{x_{\min}\}} PD(x, x_{ref}), \quad (6)$$

where  $x_{ref}$  is a randomly selected specimen from the maximal grade subpopulation, i.e., mesenchymal specimen subpopulation. The selection of  $x_0$  was limited among specimens with the smallest grade subpopulation  $\{x_{\min}\}$ , i.e., epithelial specimen subpopulation, to eliminate potential influence of a few outliers in the data.

7) Finally, we can obtain the pseudotime score for each specimen  $x$  as follows:

$$s = PD(x, x_0). \quad (7)$$

According to the pseudotime score, the corresponding specimens are arranged in ascending order, and the sorted samples are mapped to a smoothed temporal trajectory.

## REFERENCES

- [1] Qiu, Y. *et al.* (2020). A combinatorially regulated RNA splicing signature predicts breast cancer EMT states and patient survival, *RNA*, **26**(9), 1257–1267.
- [2] Sun, X. *et al.* (2021). Inferring latent temporal progression and regulatory networks from cross-sectional transcriptomic data of cancer samples, *PLoS Computational Biology*, **17**(3), e1008379.
